# Supplementary material for: Adult Antarctic krill proves resilient in a simulated high CO2 ocean
Source: PubMed Central journal article supplement (PMC6233221; doi:10.1038/s42003-018-0195-3), 2018-11-13
Supplement: 42003_2018_195_MOESM1_ESM.pdf [file 42003_2018_195_MOESM1_ESM.pdf]

## Supplementary Information

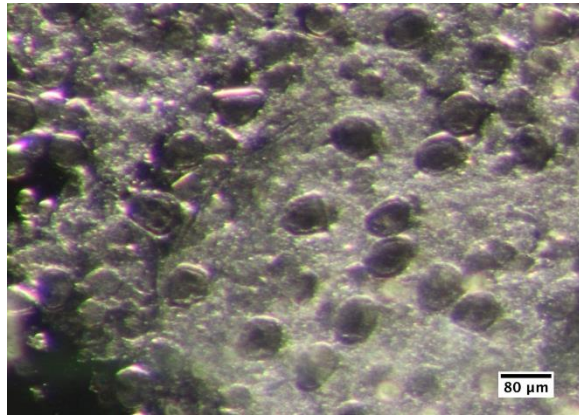

**a. Oogenesis**

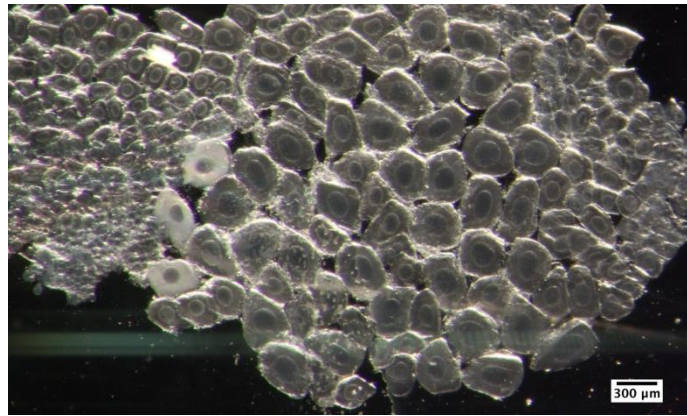

**b. Late Previtellogenesis / Early Vitellogenesis**

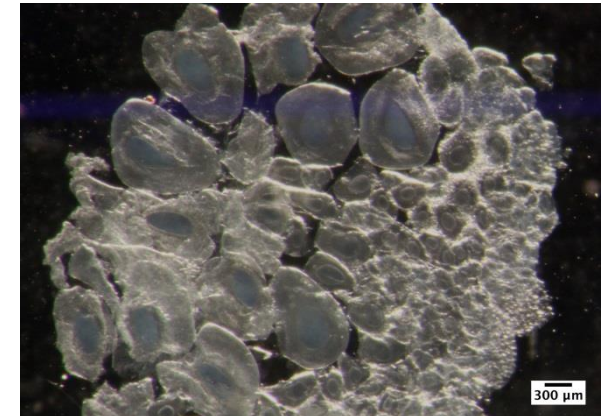

**c. Vitellogenesis**

**Supplementary Figure 1.** Examples of ovary stages observed in *Euphausia superba*. Ovary stages shown are (a) stage 2, oogenesis (b) stage 4.5, late previtellogenesis/early previtellogenesis and (c) stage 6, vitellogenesis.

**Supplementary Table 1.** Maturity scores (range and mean) for *Euphausia superba* from each CO<sub>2</sub> treatment, sampled during weeks 39, 41, 43 and 46 (October – December 2016). See Supplementary Table 5 for maturity staging key. For each of the 400, 1000, 1500 and 2000  $\mu\text{atm } p\text{CO}_2$  treatments n = 5, and for the 4000  $\mu\text{atm } p\text{CO}_2$  treatment n = 3.

| Treatment<br>( $\mu\text{atm } p\text{CO}_2$ ) | Week 39 |      | Week 41 |      | Week 43 |      | Week 46 |      |
|------------------------------------------------|---------|------|---------|------|---------|------|---------|------|
|                                                | Range   | Mean | Range   | Mean | Range   | Mean | Range   | Mean |
| 400                                            | 1 – 2   | 1.6  | 1 – 2   | 1.4  | 1 – 2   | 1.6  | 2 – 3   | 2.2  |
| 1000                                           | 1 – 2   | 1.4  | 1 – 2   | 1.4  | 1 – 2   | 1.4  | 2       | 2.0  |
| 1500                                           | 1 – 2   | 1.2  | 1 – 2   | 1.4  | 1 – 2   | 1.6  | 1 – 2   | 1.8  |
| 2000                                           | 1 – 2   | 1.4  | 1 – 2   | 1.4  | 1 – 2   | 1.6  | 1 – 2   | 1.8  |
| 4000                                           | 1       | 1.0  | 1       | 1.0  | 1       | 1.0  | 1 – 2   | 1.5  |

**Supplementary Table 2.** Measured  $\text{pH}_{\text{NIST}}$  (mean  $\pm$  SD),  $\text{pH}_{\text{total}}$  (mean),  $p\text{CO}_2$  (mean), seawater temperature (mean  $\pm$  SD), alkalinity (mean  $\pm$  SD), dissolved inorganic carbon (mean  $\pm$  SD), salinity (mean  $\pm$  SD), and calcite ( $\Omega_{\text{C}}$ ) and aragonite ( $\Omega_{\text{A}}$ ) saturation of seawater in each  $p\text{CO}_2$  treatment during the 46-week experimental period (January – December 2016). Values with an asterisk were calculated using  $\text{CO}_2\text{SYS}^1$ .

| <b>Treatment</b> | <b><math>\text{pH}_{\text{NIST}}</math></b><br>(measured) | <b><math>\text{pH}_{\text{total}}^*</math></b><br>(mol/kg SW) | <b><math>p\text{CO}_2^*</math></b><br>( $\mu\text{atm}$ ) | <b>Temp</b><br>( $^{\circ}\text{C}$ ) | <b>Alkalinity (<math>A_{\text{T}}</math>)</b><br>( $\mu\text{mol/kg SW}$ ) | <b>DIC</b><br>( $\mu\text{mol/kg SW}$ ) | <b>Salinity</b><br>(PSU) | <b><math>\Omega_{\text{C}}^*</math></b> | <b><math>\Omega_{\text{A}}^*</math></b> |
|------------------|-----------------------------------------------------------|---------------------------------------------------------------|-----------------------------------------------------------|---------------------------------------|----------------------------------------------------------------------------|-----------------------------------------|--------------------------|-----------------------------------------|-----------------------------------------|
| 400              | 8.12 ( $\pm$ 0.05)                                        | 8.07                                                          | 392                                                       | 0.5 ( $\pm$ 0.2)                      | 2456 ( $\pm$ 61)                                                           | 2320 ( $\pm$ 52)                        |                          | 2.55                                    | 1.60                                    |
| 1000             | 7.79 ( $\pm$ 0.07)                                        | 7.73                                                          | 898                                                       | 0.5 ( $\pm$ 0.2)                      | 2456 ( $\pm$ 61)                                                           | 2432 ( $\pm$ 69)                        |                          | 1.25                                    | 0.79                                    |
| 1500             | 7.61 ( $\pm$ 0.06)                                        | 7.54                                                          | 1430                                                      | 0.5 ( $\pm$ 0.2)                      | 2455 ( $\pm$ 62)                                                           | 2491 ( $\pm$ 62)                        | 35.3                     | 0.82                                    | 0.51                                    |
| 2000             | 7.48 ( $\pm$ 0.07)                                        | 7.44                                                          | 1831                                                      | 0.5 ( $\pm$ 0.2)                      | 2466 ( $\pm$ 69)                                                           | 2537 ( $\pm$ 80)                        | ( $\pm$ 0.6)             | 0.65                                    | 0.41                                    |
| 4000             | 7.09 ( $\pm$ 0.08)                                        | 7.09                                                          | 4123                                                      | 0.5 ( $\pm$ 0.2)                      | 2456 ( $\pm$ 60)                                                           | 2690 ( $\pm$ 126)                       |                          | 0.30                                    | 0.19                                    |

**Supplementary Table 3.** Light regime used during each month of the one-year ocean acidification experiment on adult *Euphausia superba*. Experimental weeks corresponding to each month are also shown in brackets.

| <b>Experimental Month</b> | <b>Time lights on</b> | <b>Time lights off</b> | <b>Maximum Lux</b> |
|---------------------------|-----------------------|------------------------|--------------------|
| January (Week 1)          | 03:30                 | 20:30                  | 82                 |
| February (Weeks 2 – 5)    | 24 hr daylight        | -                      | 100                |
| March (Weeks 6 – 9)       | 03:30                 | 20:30                  | 82                 |
| April (Weeks 10 – 14)     | 05:30                 | 18:30                  | 64                 |
| May (Weeks 15 – 18)       | 06:00                 | 18:00                  | 45                 |
| June (Weeks 19 – 22)      | 07:30                 | 16:30                  | 27                 |
| July (Weeks 23 – 27)      | 09:30                 | 14:30                  | 9                  |
| August (Weeks 28 – 31)    | 24 hr darkness        | -                      | 0                  |
| September (Weeks 32 – 36) | 09:30                 | 14:30                  | 9                  |
| October (Weeks 37 – 40)   | 07:30                 | 16:30                  | 27                 |
| November (Weeks 41 – 44)  | 06:00                 | 18:00                  | 45                 |
| December (Weeks 45 – 46)  | 05:30                 | 18:30                  | 64                 |

**Supplementary Table 4.** Sample sizes (n) for *Euphausia superba* (a) total length data and (b) triacylglycerol data for each  $p\text{CO}_2$  treatment and experimental week.

| $p\text{CO}_2$<br>Treatment | Week<br>1 | Week<br>2 | Week<br>4 | Week<br>5 | Week<br>26 | Week<br>39 | Week<br>41 | Week<br>43 | Week<br>46 |
|-----------------------------|-----------|-----------|-----------|-----------|------------|------------|------------|------------|------------|
| <b>(a) Total Length</b>     |           |           |           |           |            |            |            |            |            |
| 400 $\mu\text{atm}$         | 4         | 4         | 4         | 5         | 4          | 10         | 9          | 9          | 5          |
| 1000 $\mu\text{atm}$        | 6         | 4         | 6         | 6         | 5          | 9          | 10         | 10         | 5          |
| 1500 $\mu\text{atm}$        | 4         | 5         | 5         | 7         | 4          | 9          | 9          | 9          | 5          |
| 2000 $\mu\text{atm}$        | 4         | 5         | 6         | 5         | 4          | 9          | 9          | 9          | 5          |
| 4000 $\mu\text{atm}$        | 4         | 4         | 5         | 4         | 5          | 6          | 6          | 6          | 2          |
| <b>(b) Triacylglycerol</b>  |           |           |           |           |            |            |            |            |            |
| 400 $\mu\text{atm}$         | 4         | 4         | 4         | 4         | 4          | 5          | 4          | 5          | n/a        |
| 1000 $\mu\text{atm}$        | 5         | 4         | 4         | 5         | 5          | 4          | 5          | 5          | n/a        |
| 1500 $\mu\text{atm}$        | 4         | 5         | 4         | 5         | 4          | 4          | 4          | 4          | n/a        |
| 2000 $\mu\text{atm}$        | 4         | 5         | 5         | 5         | 4          | 4          | 4          | 4          | n/a        |
| 4000 $\mu\text{atm}$        | 4         | 4         | 5         | 4         | 5          | 3          | 3          | 3          | n/a        |

**Supplementary Table 5.** Maturity stages of subadult and adult *Euphausia superba* and their associated maturity scores. Modified from Seigel<sup>2</sup>.

| <b>Maturity Stage</b> | <b>Description</b>                                                                                  | <b>Maturity Score</b> |
|-----------------------|-----------------------------------------------------------------------------------------------------|-----------------------|
| <b>Male</b>           |                                                                                                     |                       |
| IIA3                  | subadult male – petasma is two lobed, wing present                                                  | 1                     |
| IIIA                  | adult male – petasma fully developed                                                                | 2                     |
| <b>Female</b>         |                                                                                                     |                       |
| IIB                   | subadult female – developing thelycum present, colour is feeble or absent                           | 1                     |
| IIIA                  | adult female – thelycum fully developed, red in colour, no spermatophores present, body not swollen | 2                     |
| IIID                  | gravid female – thorax and first and second abdominal segment swollen by enlarged ovary             | 3                     |

**Supplementary Table 6.** Ovary phases and stages of *Euphausia superba* determined from their cell type, cell size ( $\mu\text{m}$ ) and squash appearance. Modified from tables and keys in Cuzin-Roudy & Amsler<sup>3</sup>.

| <b>Cell Type</b> | <b>Cell Size (<math>\mu\text{m}</math>)</b> | <b>Squash appearance</b> | <b>Physiological Phase</b> | <b>Ovary Stage</b> |
|------------------|---------------------------------------------|--------------------------|----------------------------|--------------------|
| yoc              | 50 - 150                                    | clear                    | Oogenesis                  | 2                  |
| oc1              | 150 - 200                                   | translucent              | Previtellogenesis          | 3                  |
|                  | 200 - 450                                   | translucent              | Previtellogenesis          | 4                  |
| oc2              | 250 - 450                                   | cloudy and whitish       | Early Vitellogenesis       | 5                  |
| oc3              | over 450                                    | granular and whitish     | Vitellogenesis             | 6                  |

## Supplementary References

1. Pierrot D., Lewis E. & Wallace, D. W. R. MS Excel program developed for CO<sub>2</sub> system calculations. Carbon Dioxide Information Analysis Center, Oak Ridge, 10.3334/CDIAC/otg.CO2SYS\_XLS\_CDIAC105a (2006).
2. Siegel, V. Introducing Antarctic Krill *Euphausia superba* Dana, 1850 in *Biology and Ecology of Antarctic Krill. Advances in Polar Ecology* (ed. Siegel, V.) 1–19 (Springer International Publishing, 2016).
3. Cuzin-Roudy, J. & Amsler, M. O. Ovarian development and sexual maturity staging in Antarctic krill *Euphausia superba* Dana (Euphausiacea). *J Crustac Biol.* **11**, 236–249 (1991)
